# Supplementary material for: Cell-type-specific genomics reveals histone modification dynamics in mammalian meiosis
Source: PubMed Central journal article supplement (PMC6707301; doi:10.1038/s41467-019-11820-7), 2019-08-23
Supplement: 41467_2019_11820_MOESM1_ESM.pdf [file 41467_2019_11820_MOESM1_ESM.pdf]

**Cell-type-specific genomics reveals histone modification dynamics in mammalian meiosis**

**Lam et al.**

Supplementary Figures

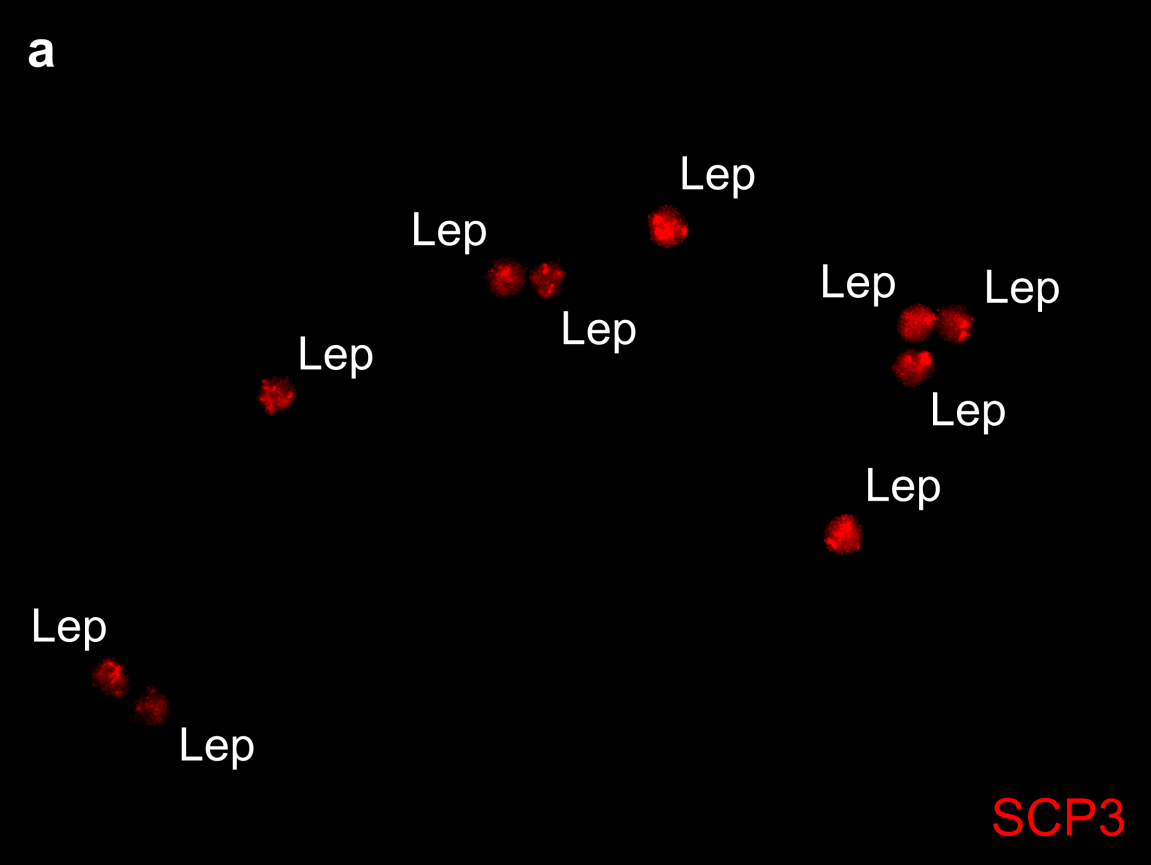

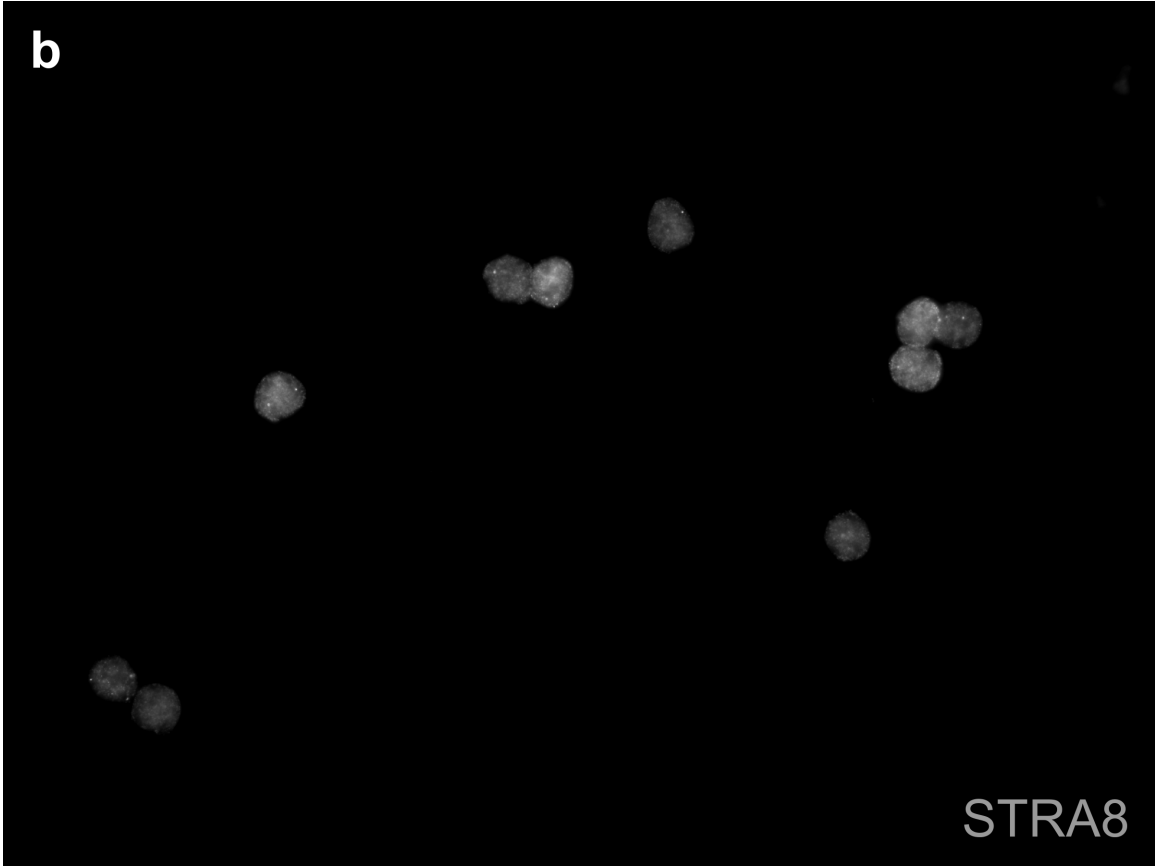

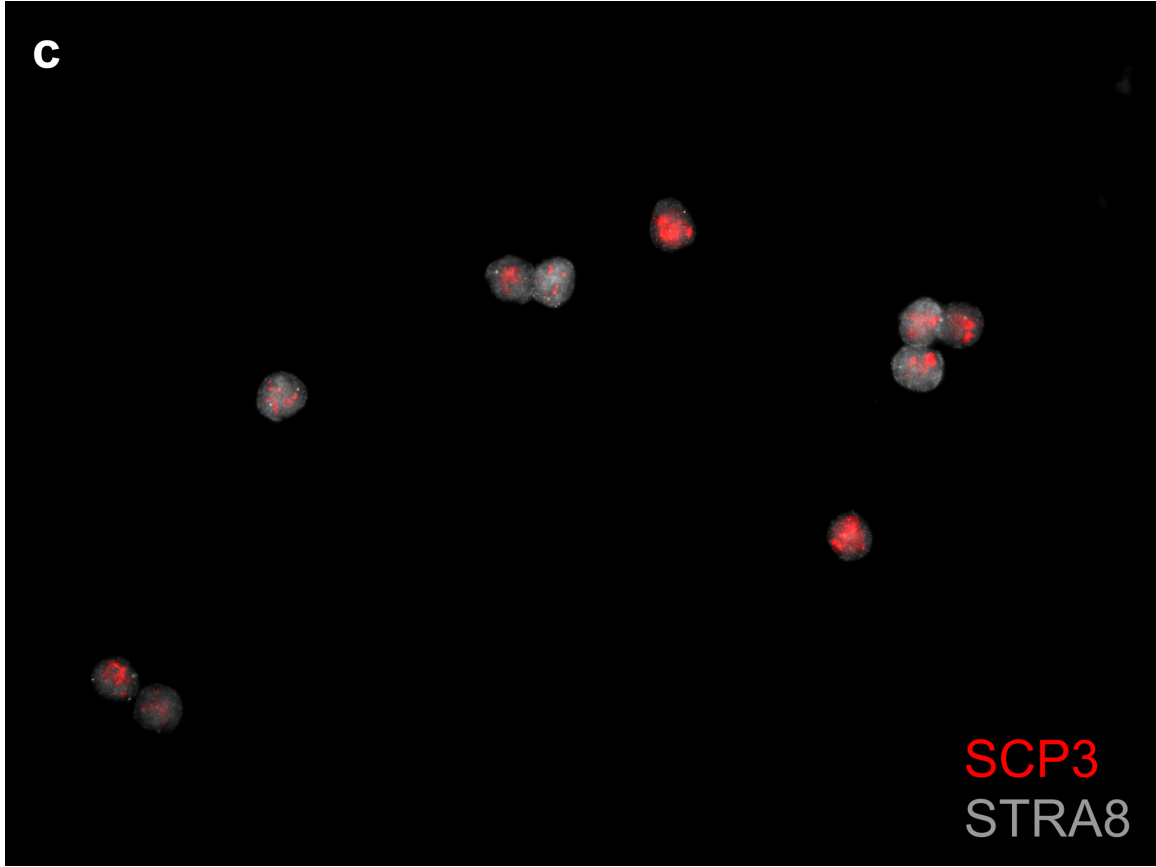



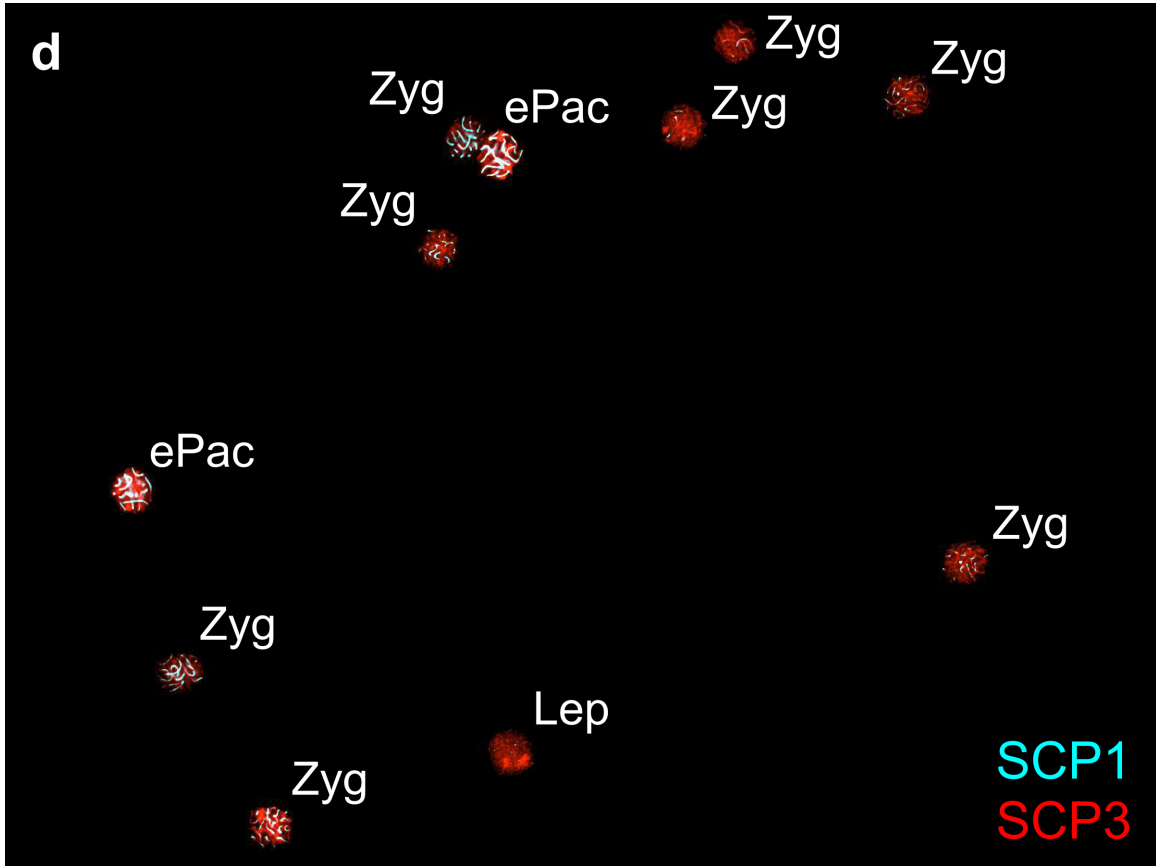

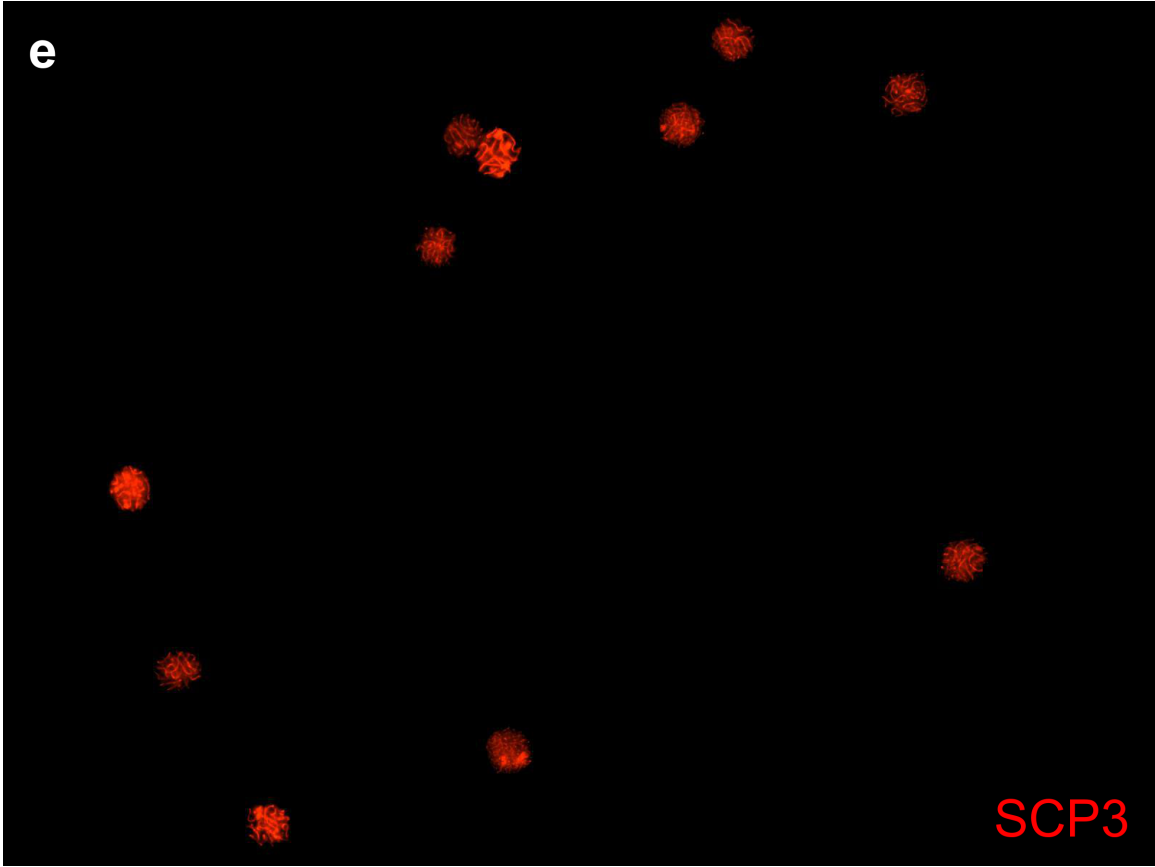

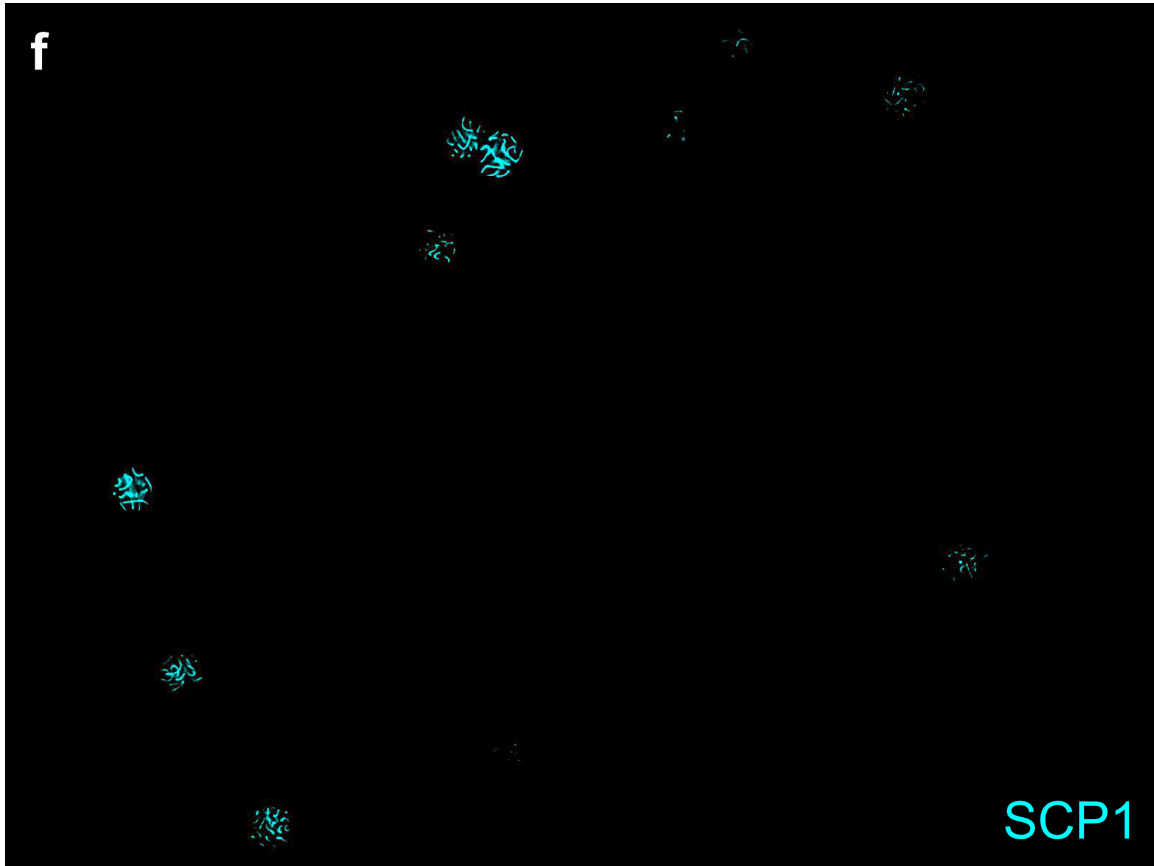

**Supplementary Fig. 1** Microscopic examination of sorted nuclei after FACS. Whole-field immunofluorescence images of sorted nuclei in the populations of **a-c** leptonema and **d-f** zygonema. Lep=leptonema; Zyg=zygonema; ePac=early pachynema.

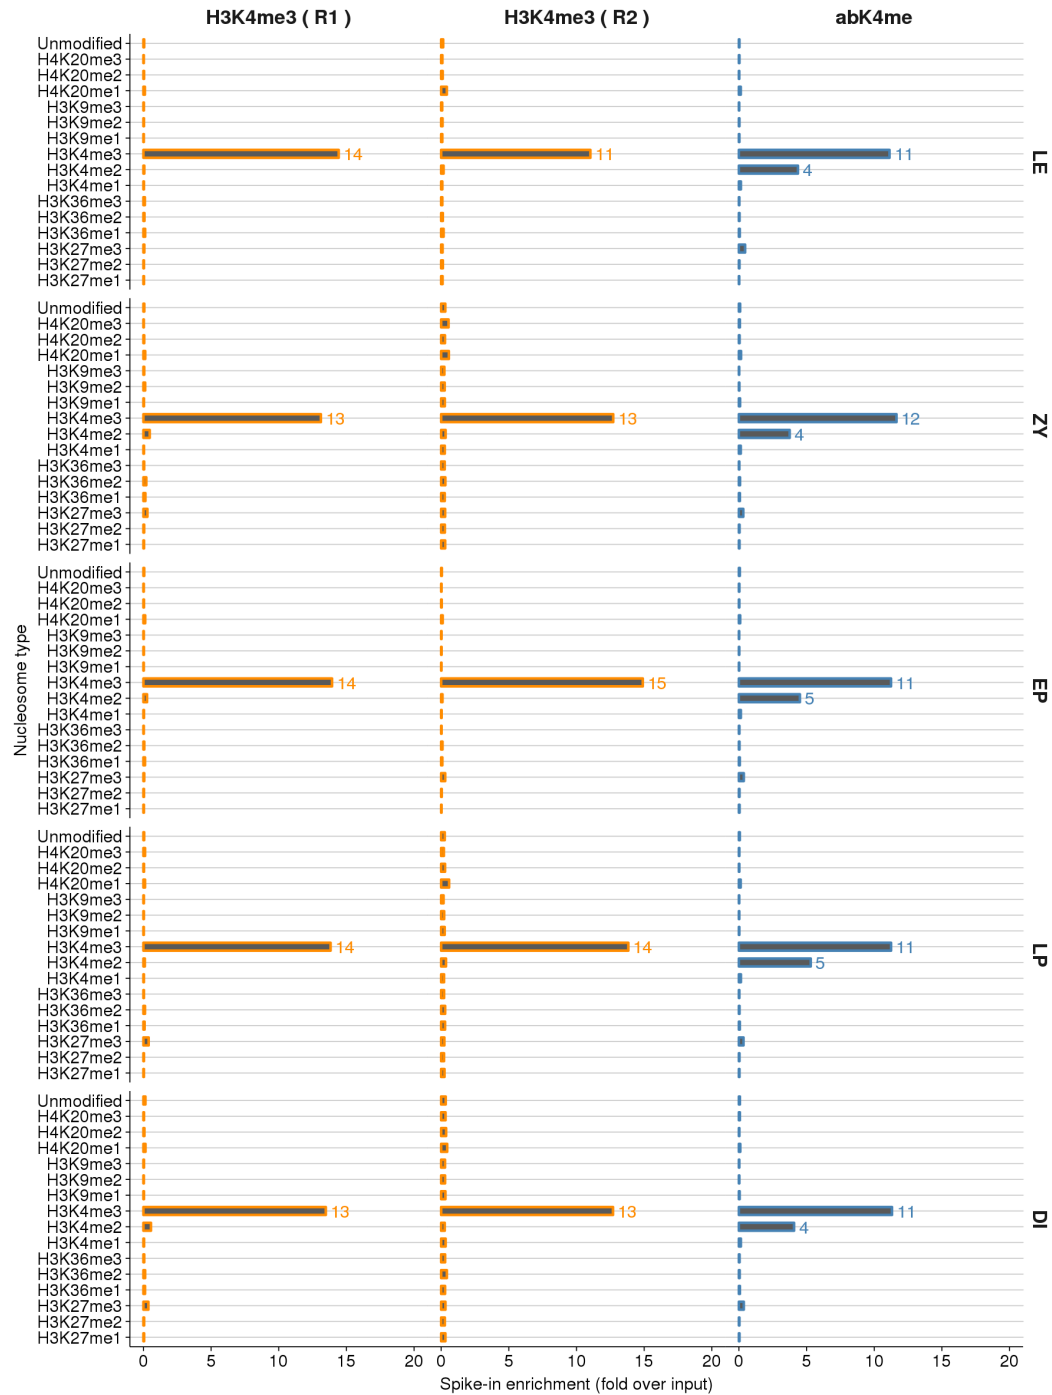

**Supplementary Fig. 2 H3K4me3 antibodies have varying levels of substrate specificity.**

We performed ChIP-Seq across five MPI stages using two H3K4me3 antibodies; EpiCypher 13-0028 (H3K4me3; two replicates) and Abcam ab8580 (abK4me). The EpiCypher K-MetStat panel is a collection of nucleosomes with different histone modifications that was spiked into each H3K4me3 ChIP-Seq experiment

to validate the specificity of the antibody and to allow cross sample normalization for ChIP-efficiency (see methods). The relative enrichment of sequences bound to each modified nucleosome are shown here, compared to the relative frequency in the sample before ChIP was performed. The Epicypher antibody is highly specific to H3K4me3, however, as previously demonstrated<sup>1</sup>, the Abcam antibody shows substantial cross-reactivity with H3K4me2. Note that although the enrichment for H3K4me2 is relatively low compared to H3K4me3, the relative abundance of H3K4me2 in the genome compared to H3K4me3<sup>1</sup> makes it difficult to assess the quantitative impact of this cross-reactivity in ChIP-Seq experiments.

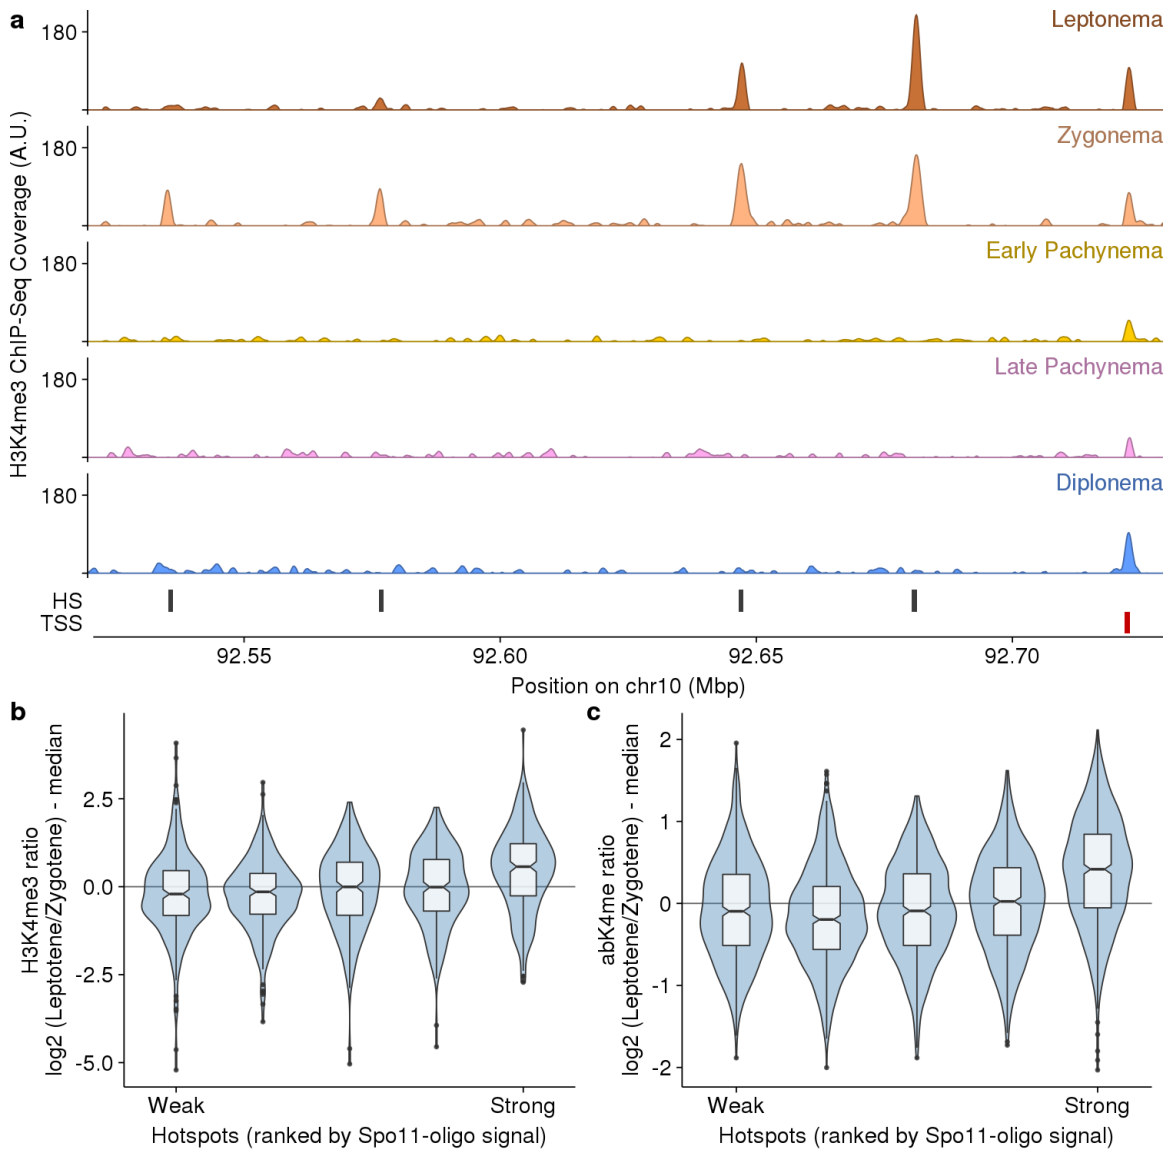

**Supplementary Fig. 3** H3K4me3 is relatively elevated at stronger DSB hotspots in leptonema. **a** Snapshot of H3K4me3 at four DSB hotspots. The DSB hotspots are progressively stronger from left to right. At the three weaker hotspots (left) the H3K4me3 signal is maximal at zygonema. At the strongest hotspot (right) the H3K4me3 signal is strongest at leptonema. **b-c** Systematic trend towards stronger leptonema H3K4me3 at stronger DSB hotspots. **b** The H3K4me3 ratio between leptonema and zygonema is shown. **c** A more pronounced trend is seen using the Abcam ab8580 H3K4me3 antibody (abK4me).

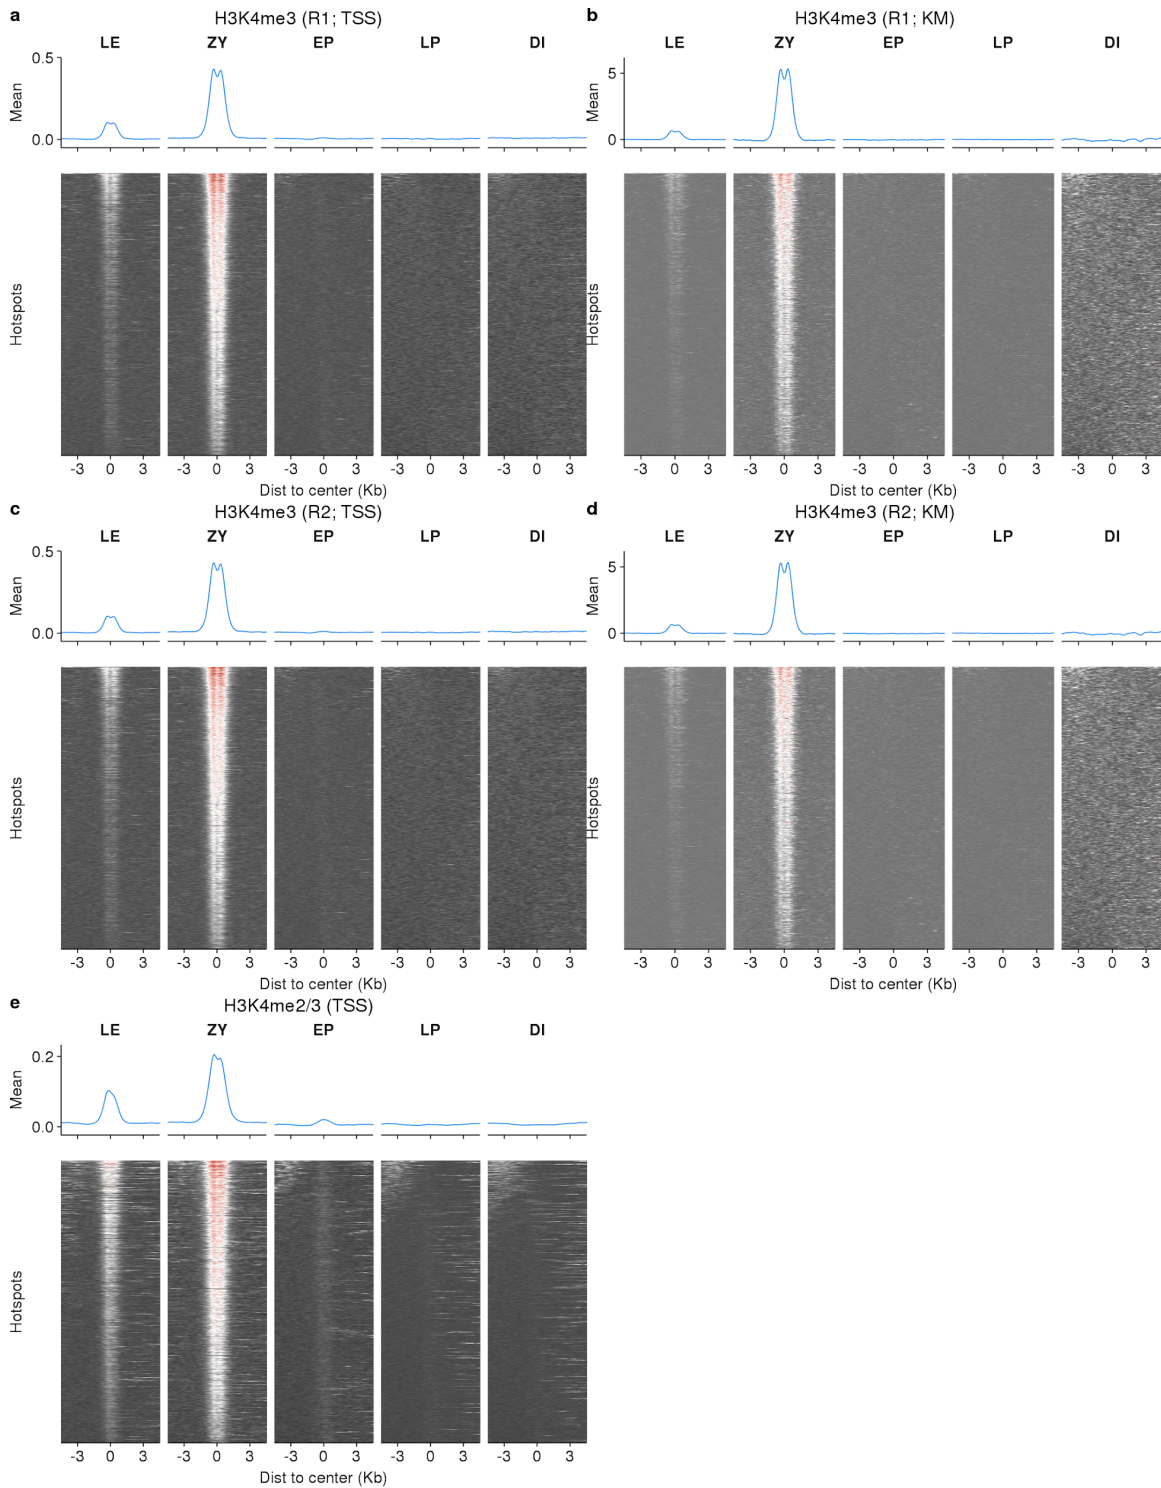

**Supplementary Fig. 4 H3K4me3 dynamics are similar using different normalization approaches.**

Coverage heatmaps at DSB hotspots through MPI. **a,c,e** Coverage is normalized using NCIS and stable TSS signals (see methods). **b,d** Coverage is normalized

using the K-MetStat spike-in. The spike-in normalization cannot be used for the H3K4me2/3 sample because of antibody cross-reactivity (Abcam ab8580 antibody). Both normalization methods yield similar results for H3K4me3 replicate 1 (R1; **a,b**) and replicate 2 (R2; **c,d**). A slight increase in the leptoneuma signal and a marginal signal at early pachynema are seen with the H3K4me2/3 ChIP-Seq (**e**).



### All transcripts in cluster 1

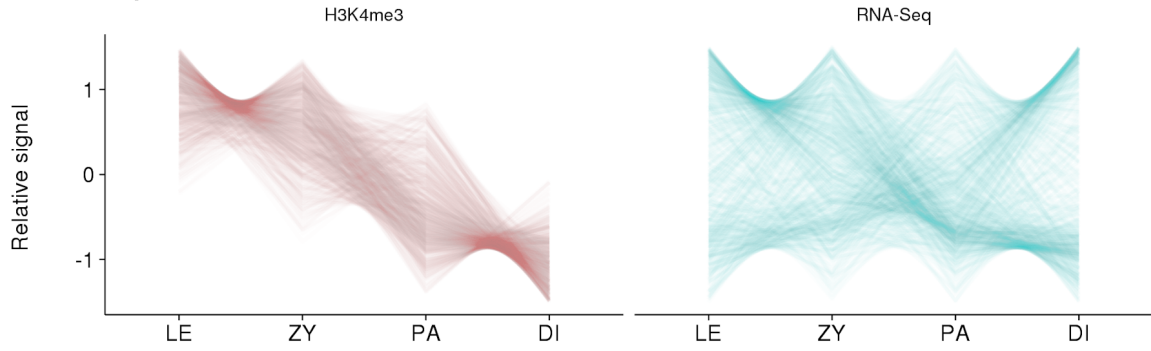

### Clustering by expression

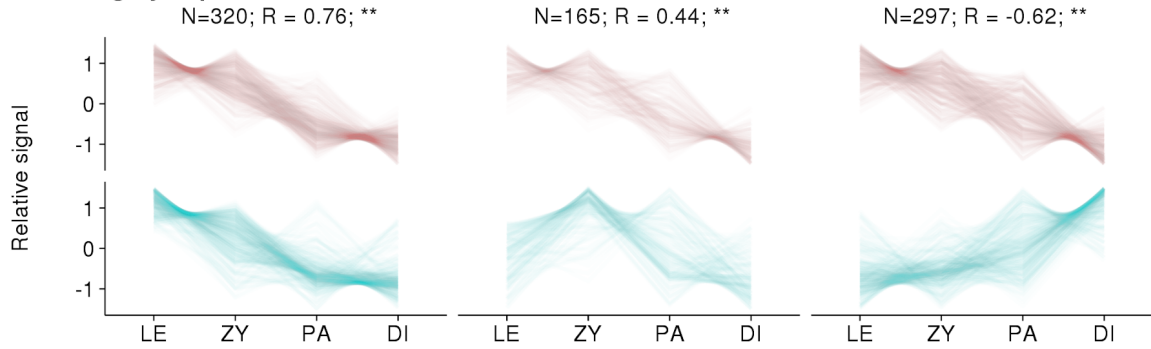

### Representative individual transcripts

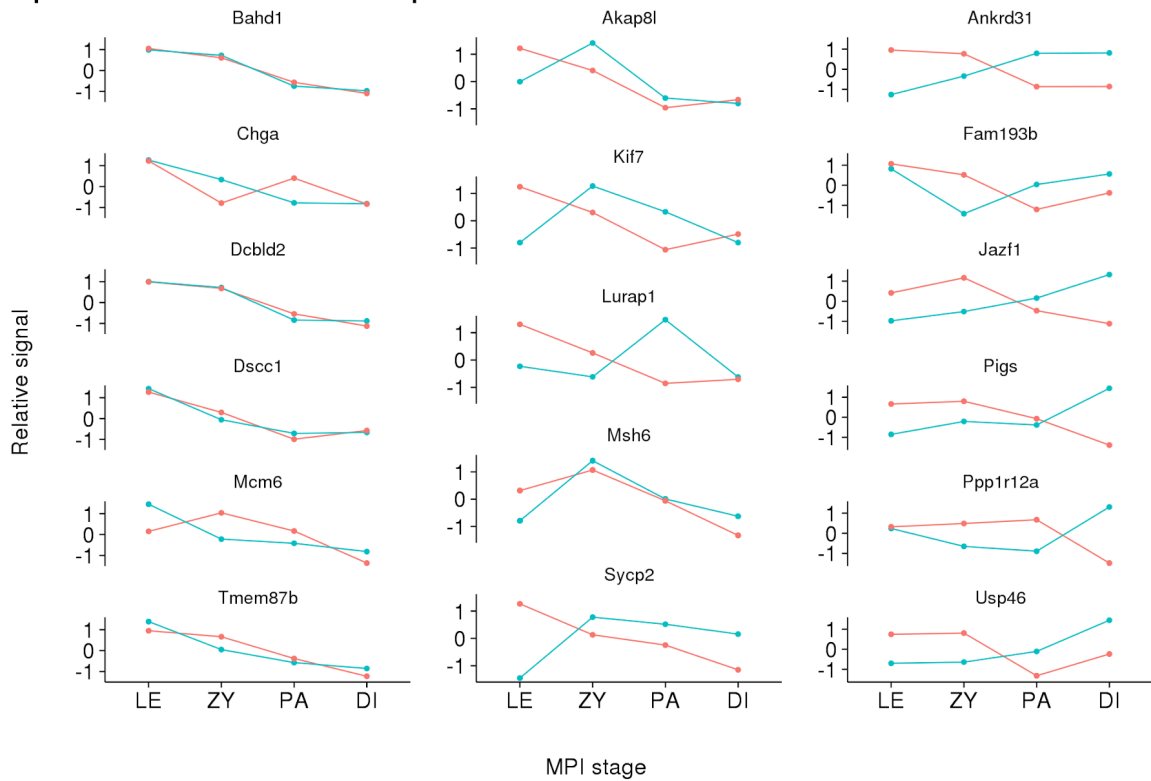

## All transcripts in cluster 2

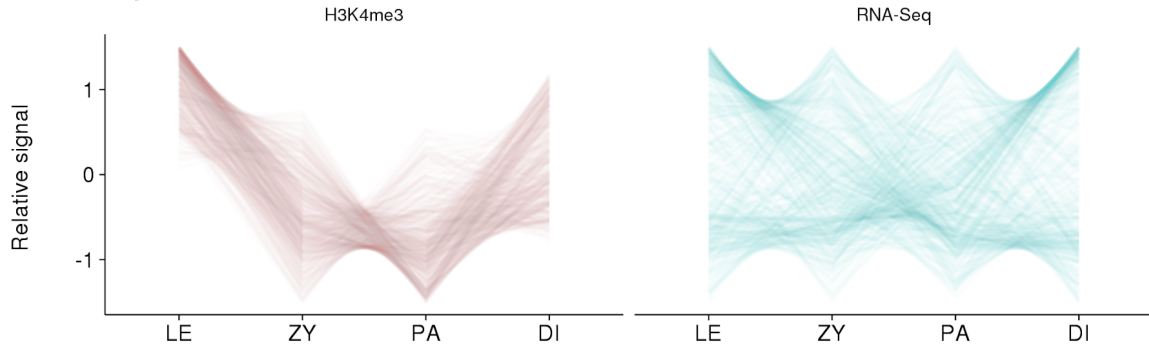

## Clustering by expression

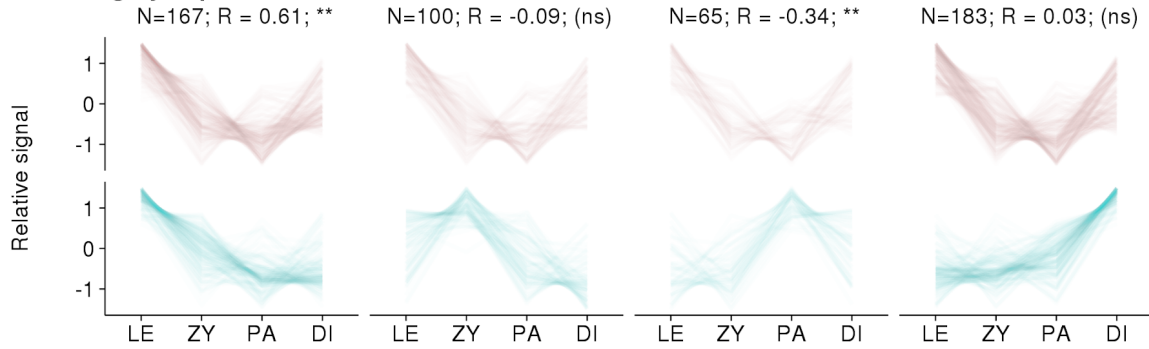

## Representative individual transcripts

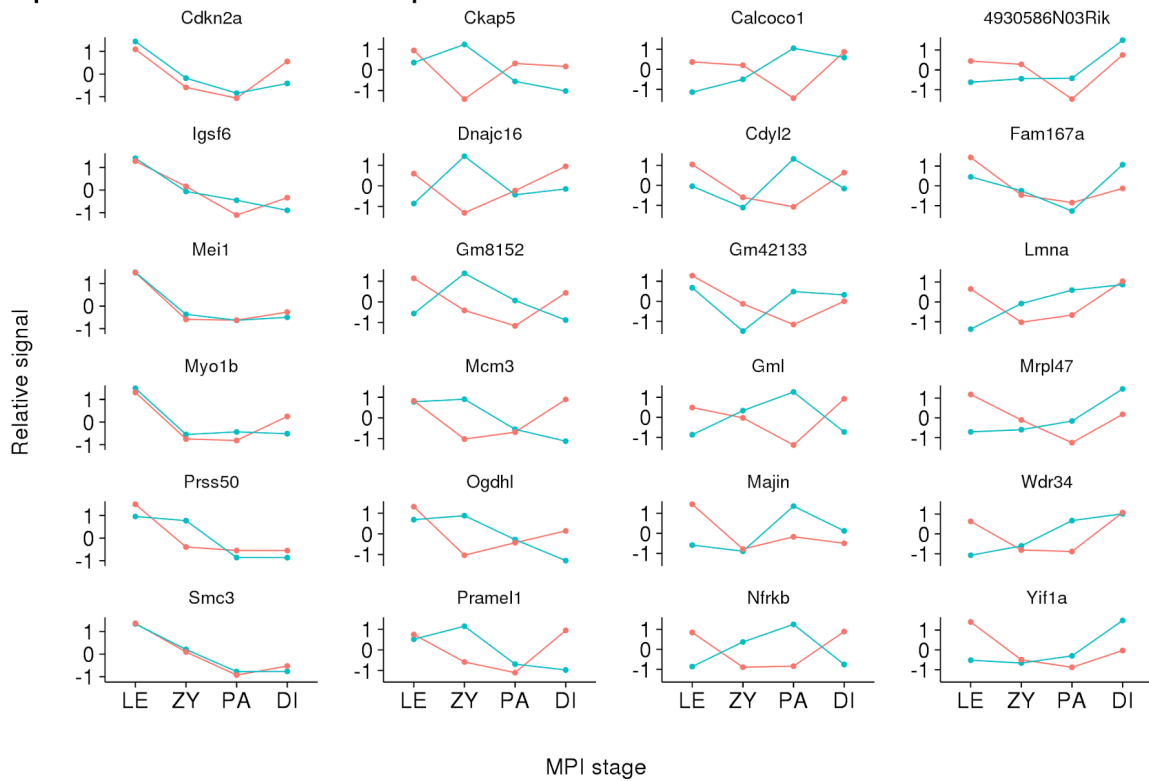

### All transcripts in cluster 3

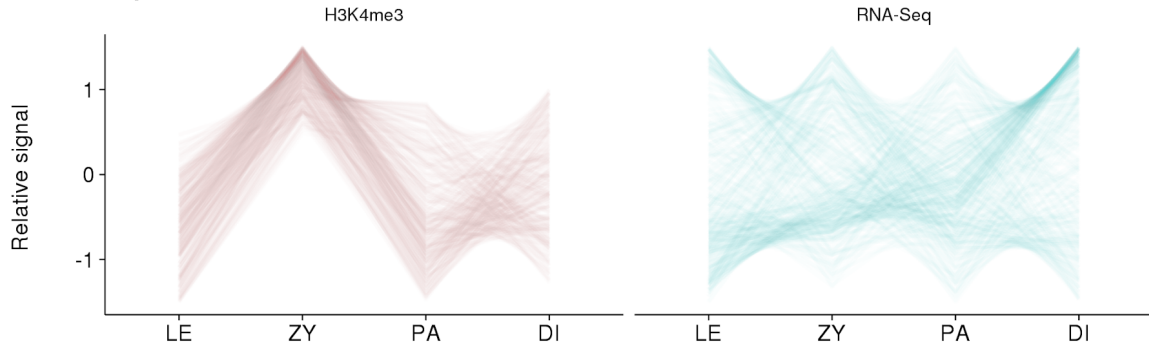

### Clustering by expression

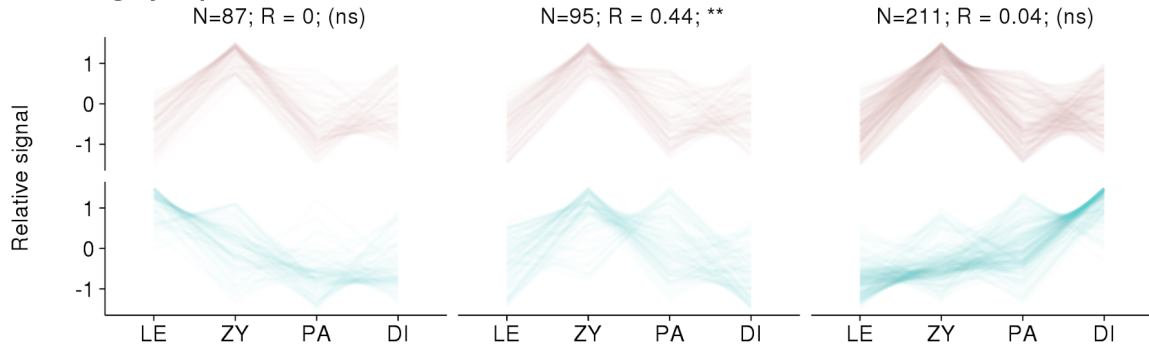

### Representative individual transcripts

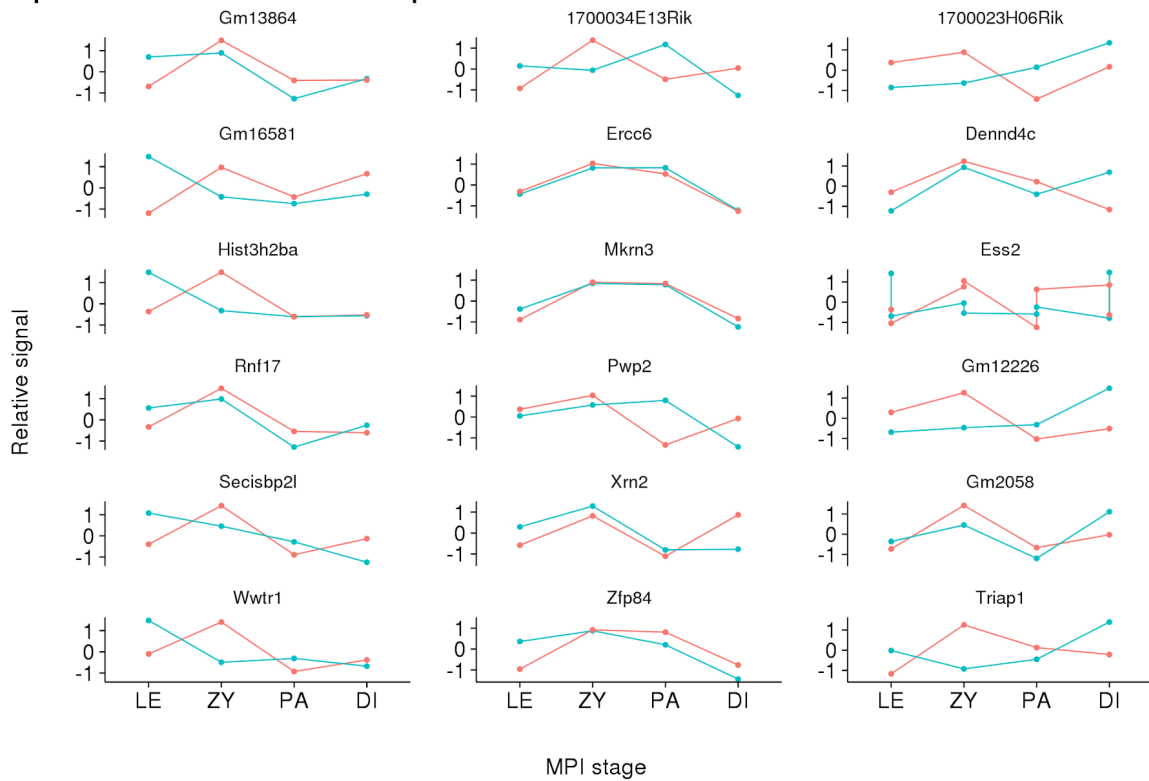

### All transcripts in cluster 4

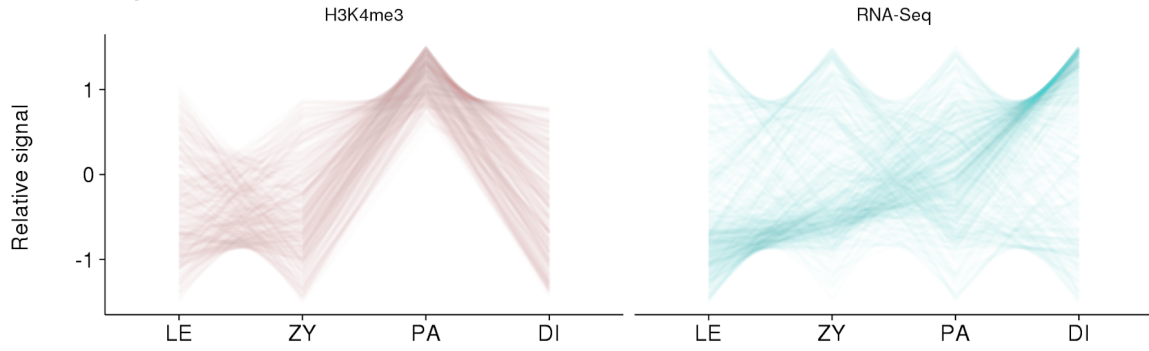

### Clustering by expression

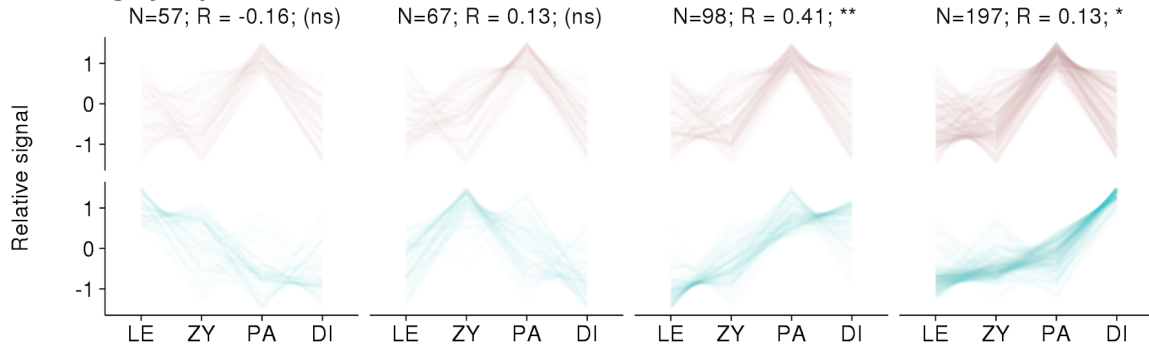

### Representative individual transcripts

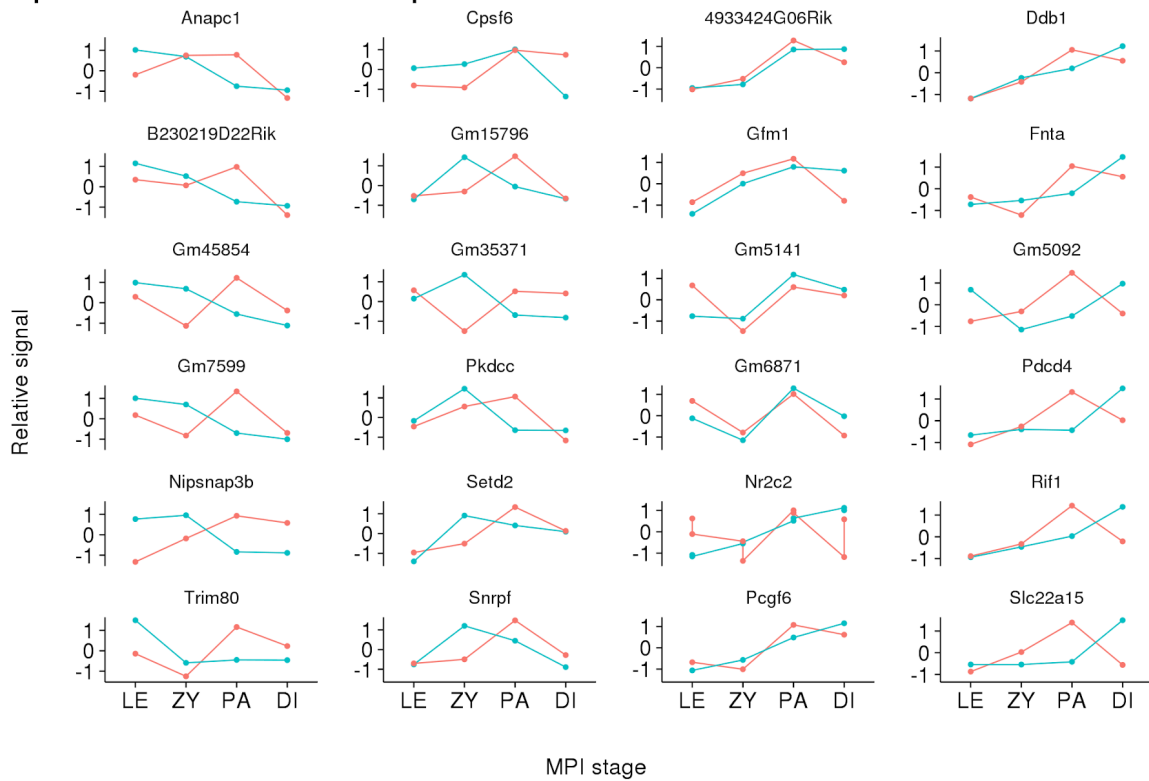

### All transcripts in cluster 5

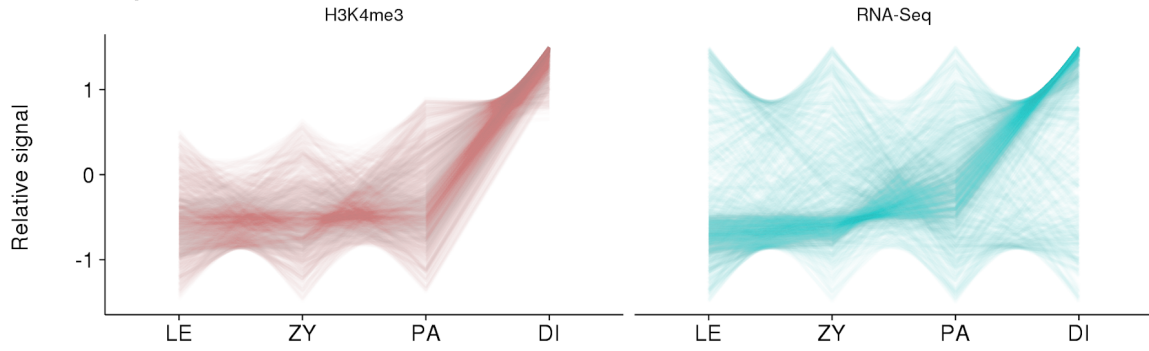

### Clustering by expression

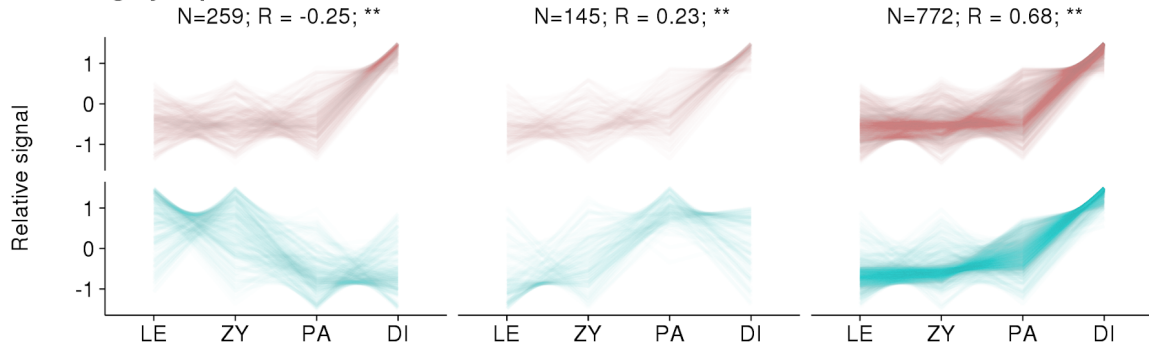

### Representative individual transcripts

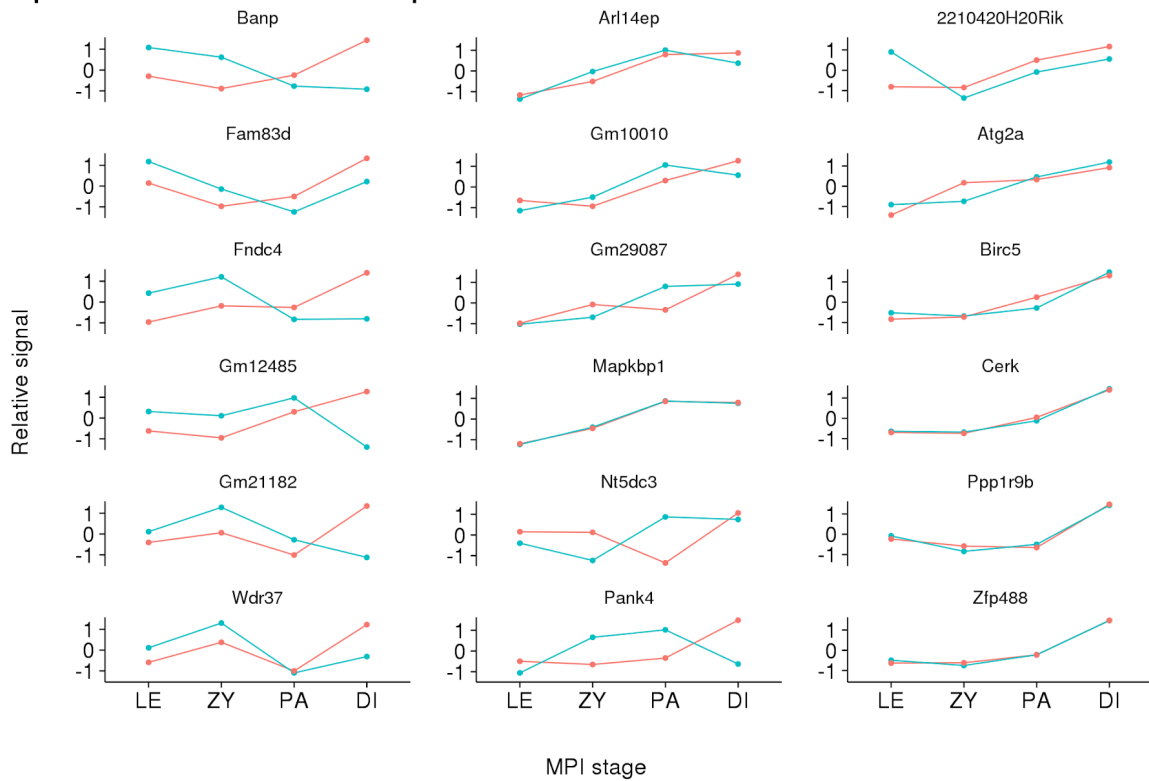

**Supplementary Fig. 5 H3K4me3 dynamics correlate with gene expression profiles from male juvenile mice.**

Each of the plots represents a single cluster of transcripts from Fig. 3 (Cluster 1-5 are from left to right on Fig. 3c, respectively). Throughout, red depicts H3K4me3 ChIP-Seq signal and blue depicts gene expression from RNA-Seq. Uppermost panels show all transcripts in the cluster; lines represent individual transcripts. Transcripts were next sub-clustered by gene expression profile (middle panels; k-means clustering; optimal k chosen using gap statistic). Clusters in which profiles correlate more or less than expected are highlighted (\* =  $P < 0.01$ , \*\* =  $P < 0.001$ ; 1,000 bootstraps of shuffling stages for each gene). Six representative transcripts from each cluster are shown in the lower panel below each cluster. Transcripts of genes known to play a role in MPI were preferentially selected; if  $< 6$  such genes were present in a cluster, the remainder were randomly selected.

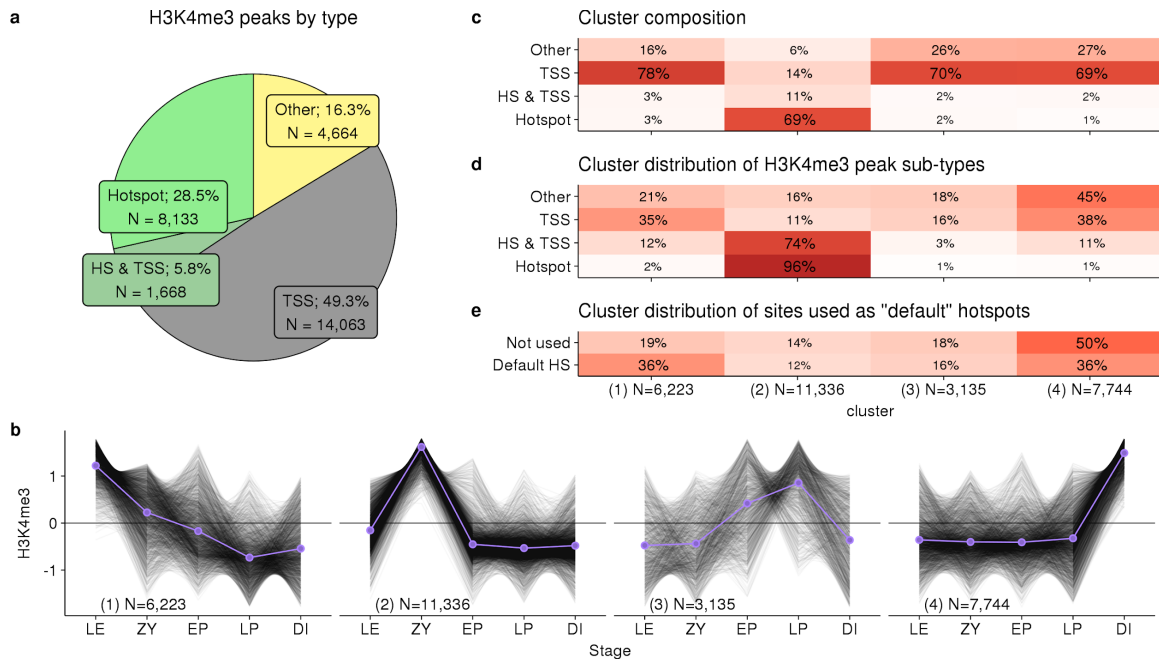

**Supplementary Fig. 6 Extensive dynamics revealed by unbiased clustering of H3K4me3 peaks.** **a** 16% of all H3K4me3 peaks occur at sites not defined at DSB hotspots or transcription start sites (TSS). These are classified as “Other”. 5.8% of H3K4me3 peaks coincide with both a DSB hotspot and a GENCODE TSS (HS & TSS). **b** Unbiased k-means clustering of MPI H3K4me3 profiles. Cluster number is indicated in parentheses in the bottom left corner. Each black line represents the MPI profile of an individual H3K4me3 peak. 10,000 randomly chosen profiles are shown. Purple lines depict the mean profile for each cluster. Profiles are normalized by the mean and standard deviation. The optimum number of clusters was identified using the gap statistic (optimum  $k = 5$ ; range tested =  $2 < k < 24$ ). Cluster number is shown on each panel in parentheses. **c** Cluster composition shown as the percentage of each type of H3K4me3 peak within each cluster. Cluster 2 ( $N=11,336$ ) is the only cluster composed primarily of peaks at DSB hotspots. **d** The percentage of peaks of each type across clusters is shown. Notably, 96% of DSB hotspots occur in cluster 2. 74% of HS & TSS peaks also occur in this cluster, suggesting that H3K4me3 at many of these sites is PRDM9-mediated. **e** In mice lacking PRDM9, PRDM9-independent H3K4me3 peaks are used for targeting the DSB machinery. These sites are termed “default hotspots” and are defined as H3K4me3 peaks that coincide with a DSB hotspot in *Prdm9*<sup>-/-</sup> mice<sup>2</sup>. Default hotspots form more frequently than expected at H3K4me3 peaks that are present in early MPI (cluster 1;  $N = 6,223$ ). Peaks with a late dynamic (cluster 4;  $N=7,744$ ) are used less than expected. The “Not used” peaks are all H3K4me3 peaks that do not coincide with either a PRDM9-defined or a default hotspot.



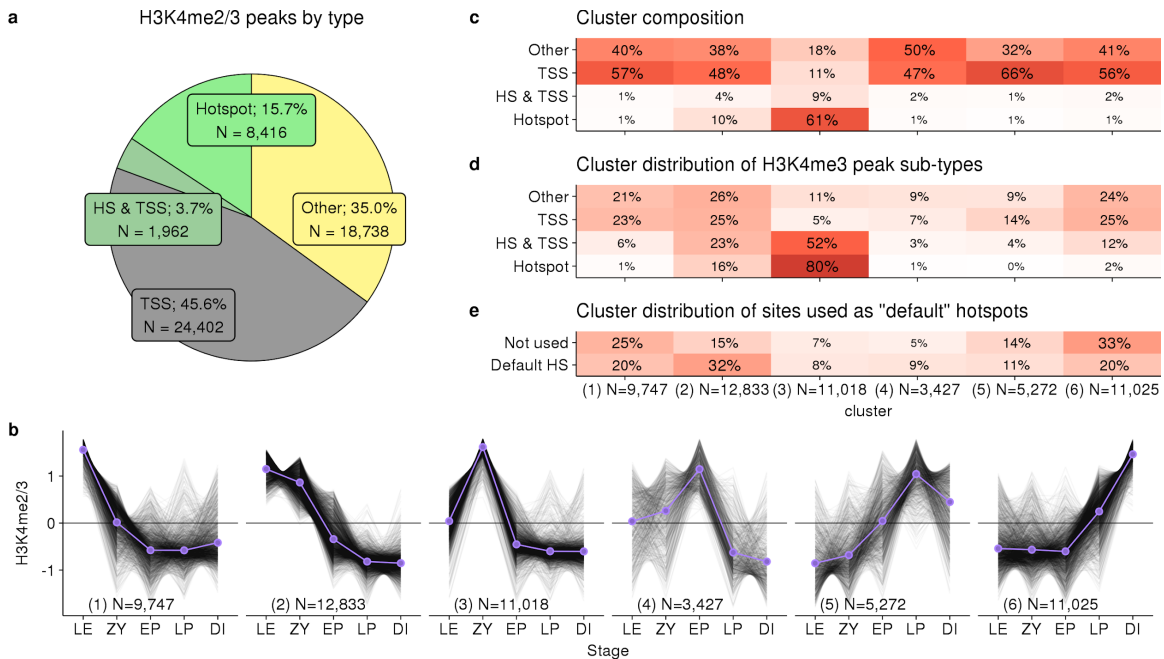

**Supplementary Fig. 7 Extensive dynamics revealed by unbiased clustering of H3K4me2/3 peaks.** **a** 35% of all H3K4me2/3 peaks (using Abcam ab8580 antibody) occur at sites not defined at DSB hotspots or transcription start sites (TSS). These are classified as “Other”. 3.7% of H3K4me3 peaks coincide with both a DSB hotspot and a GENCODE TSS (HS & TSS). **b** Unbiased k-means clustering of MPI H3K4me2/3 profiles. Cluster number is indicated in parentheses in the bottom left corner. Each black line represents the MPI profile of an individual H3K4me2/3 peak. 10,000 randomly chosen profiles are shown. Purple lines depict the mean profile for each cluster. Profiles are normalized by the mean and standard deviation. The optimum number of clusters was identified using the gap statistic (optimum  $k = 6$ ; range tested =  $2 < k < 24$ ). Cluster number is shown on each panel in parentheses. **c** Cluster composition shown as the percentage of each type of H3K4me2/3 peak within each cluster. Cluster 3 is the only cluster composed primarily of peaks at DSB hotspots. **d** The percentage of peaks of each type across clusters is shown. Notably, 80% of DSB hotspots occur in cluster 3. 52% of HS & TSS peaks also occur in this cluster, suggesting that H3K4me3 at many of these sites is PRDM9-mediated. **e** In mice lacking PRDM9, PRDM9-independent H3K4me3 peaks are used for targeting the DSB machinery. These sites are termed “default hotspots” and are defined as H3K4me3 peaks that coincide with a DSB hotspot in *Prdm9*<sup>-/-</sup> mice<sup>2</sup>. Default hotspots form more frequently than expected at H3K4me3 peaks that are present in early MPI (cluster 2). Peaks with a late dynamic (cluster 5, 6) are used less than expected. “Not used” peaks are all H3K4me3 peaks that do not coincide with either a PRDM9-defined or a default hotspot.



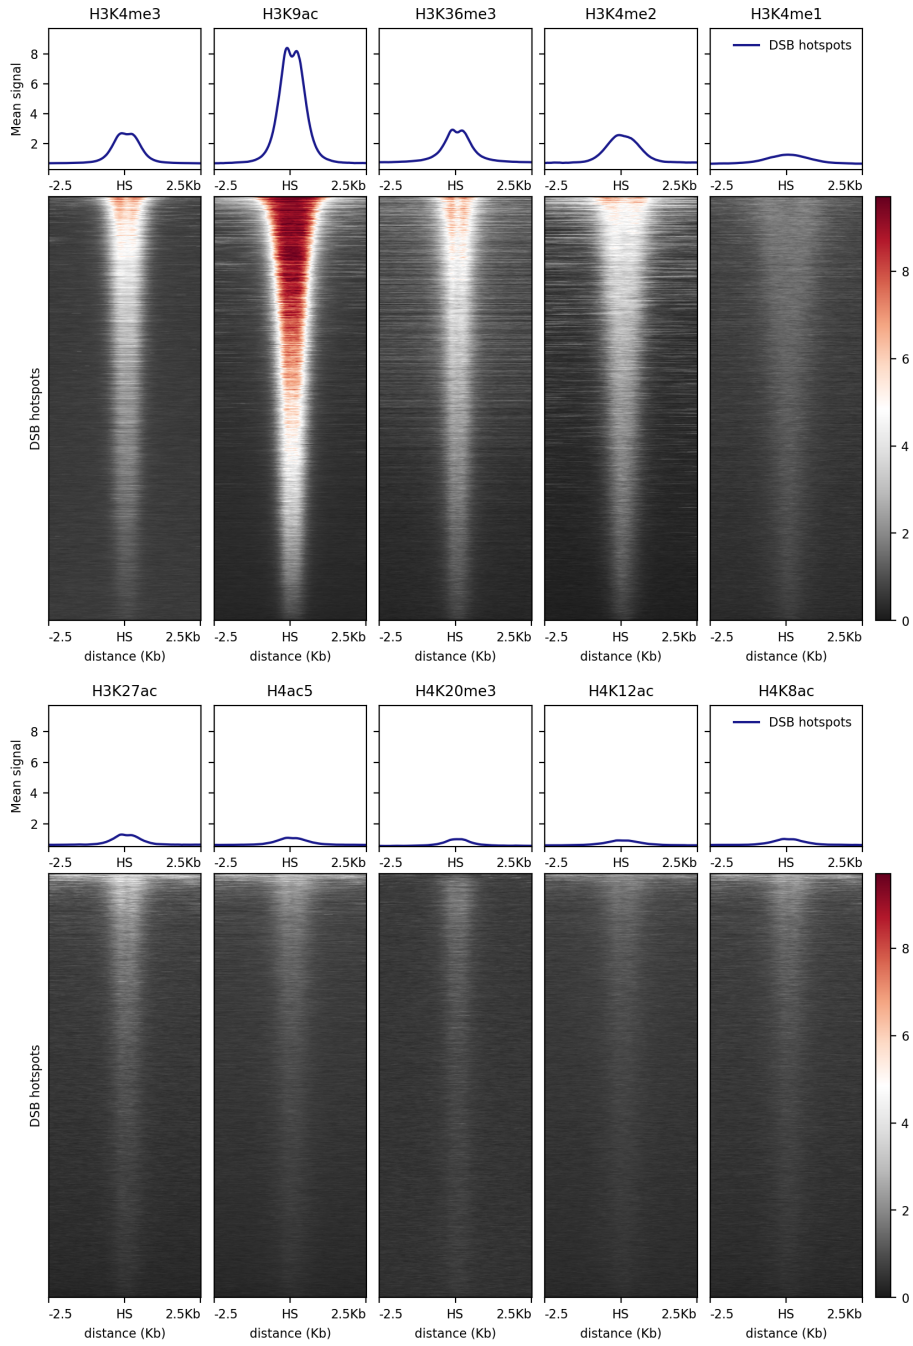

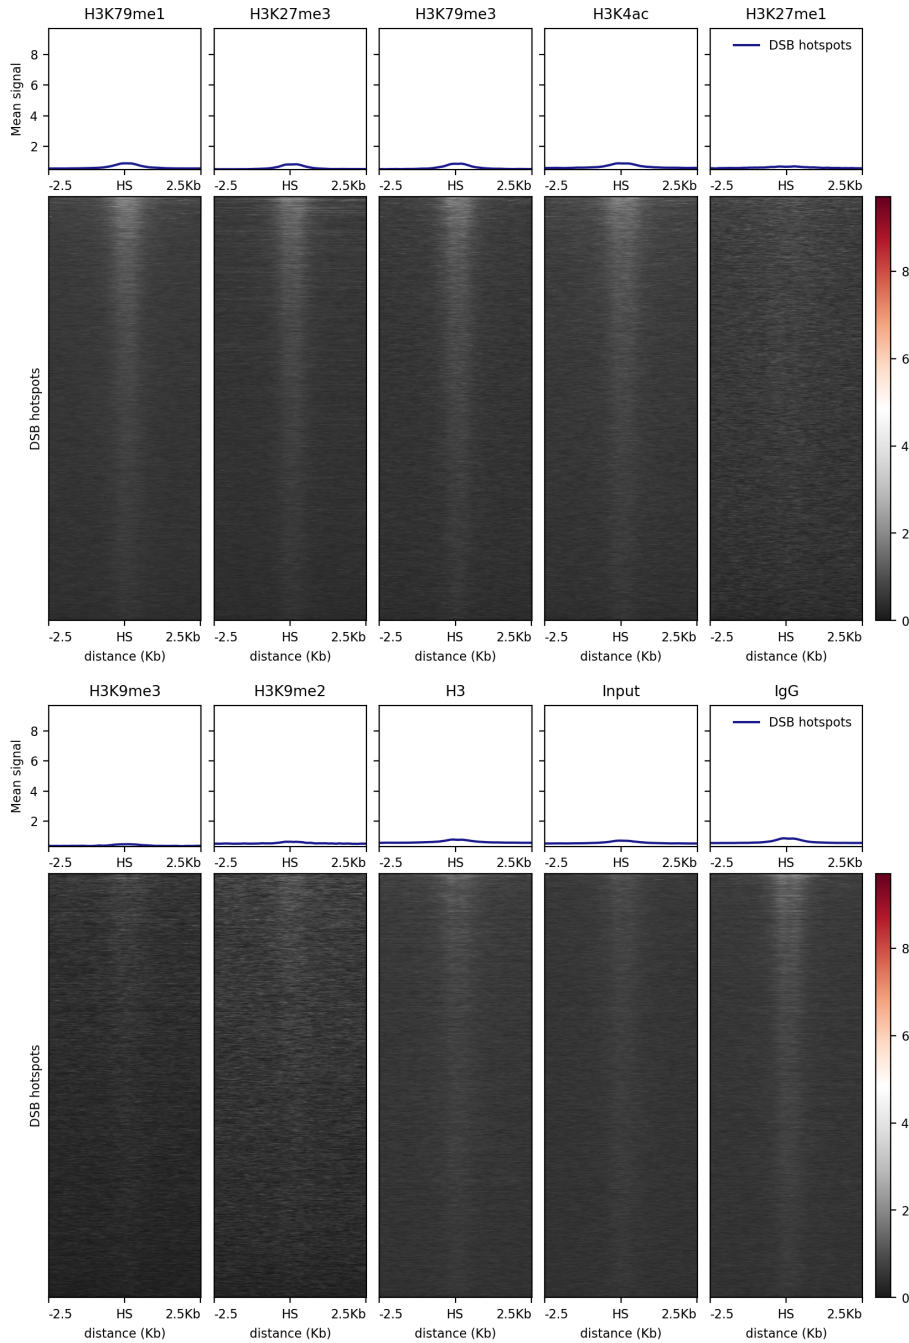

**Supplementary Fig. 8 Heatmaps of histone modification ChIP-Seq at DSB hotspots.** Coverage data were averaged in 150 bp windows and converted to reads per Kbp per million (RPKM) to facilitate cross-comparison. Heatmaps were generated using deeptools<sup>3</sup>. It is important to note that some enrichment at DSB hotspots is seen when using a non-specific antibody (IgG; last panel).

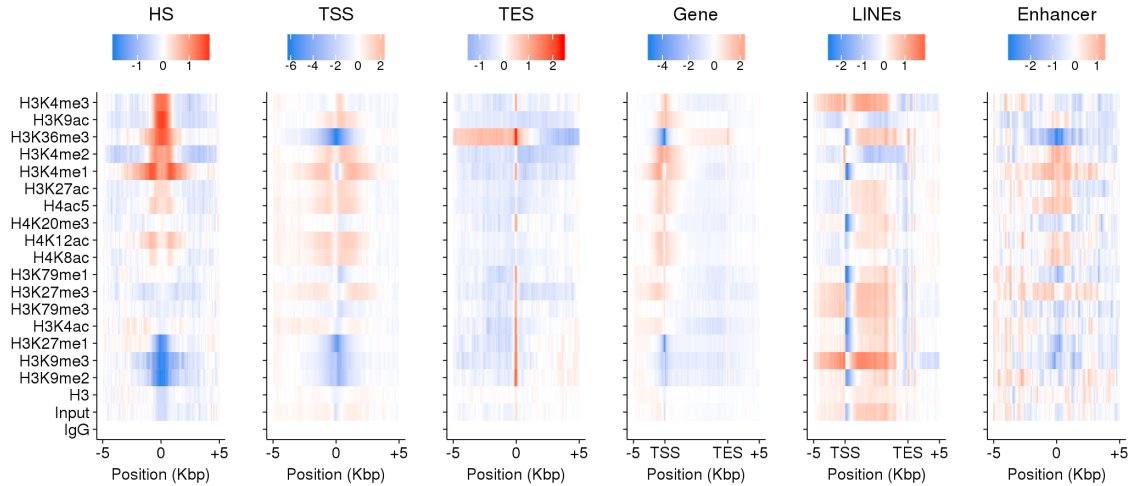

**Supplementary Fig. 9 Enrichment of histone modifications at functional genomic elements.** Histone modification coverage was plotted around functional sites in the genome. Enrichment is shown as mean signal - mean signal in IgG ChIP-Seq (red=high; blue=low). L1 LINEs were obtained from the repeatmasker database. Enhancers were obtained from the UCSC table browser RefSeq functional elements table.



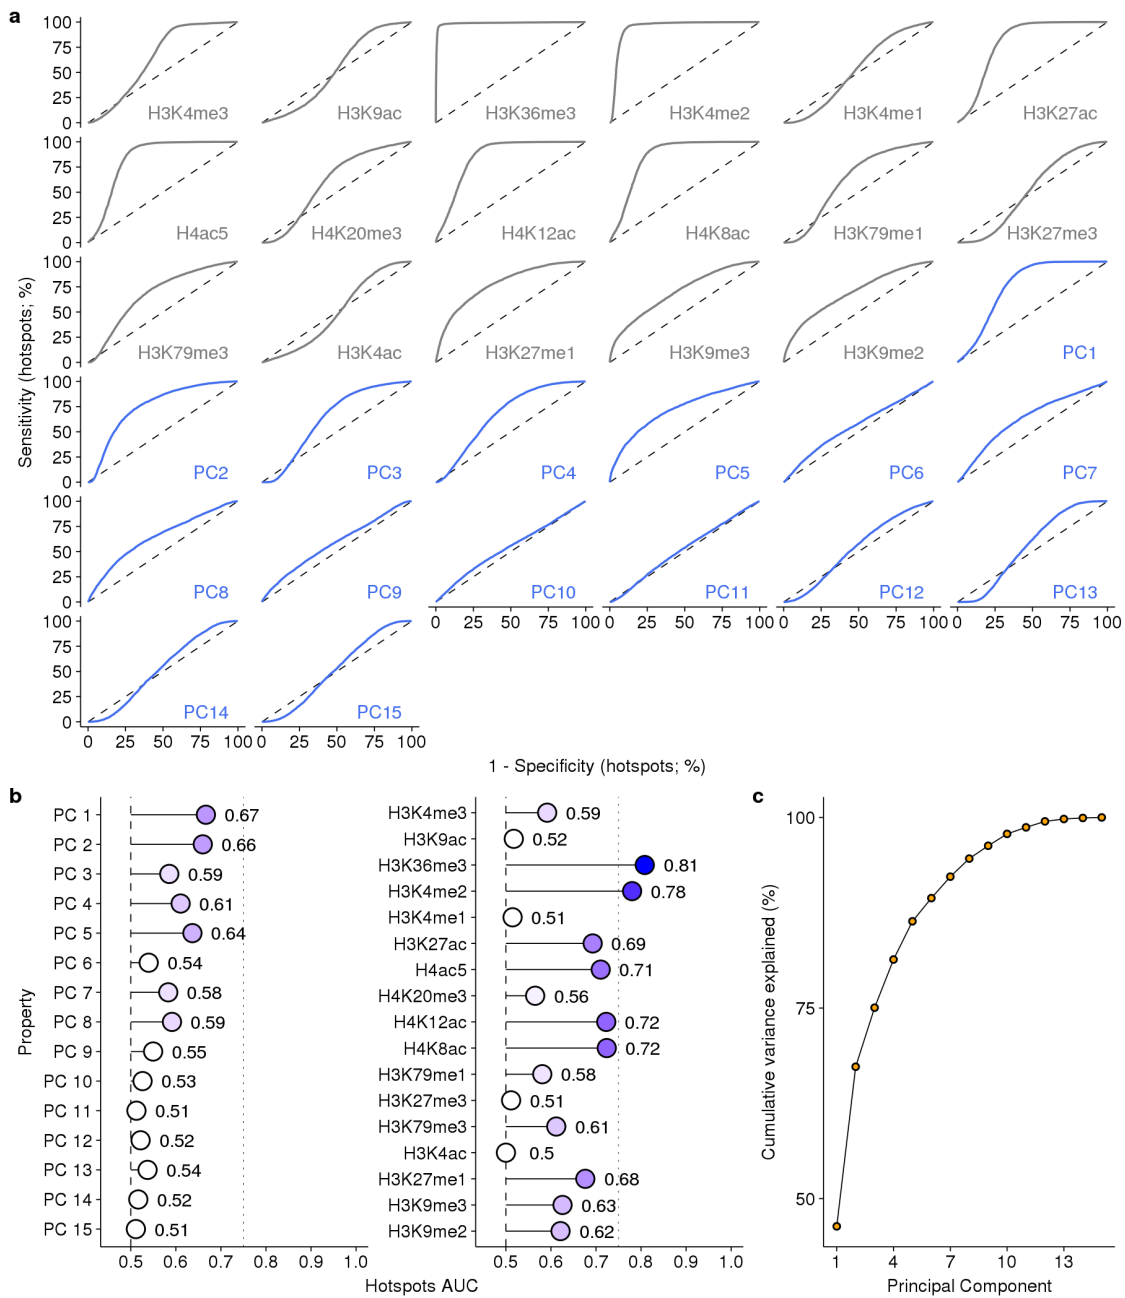

**Supplementary Fig. 11: Histone marks distinguish hotspots from other H3K4me3 sites.**

**a** ROC curves for individual histone marks and principal components (PCs) for discriminating hotspots from other H3K4me3 sites in the genome. Dashed line indicates no predictive ability. **b** The area under the ROC curves (AUC). **c** Most of the variance in histone mark signals is captured by few PCs.

# Supplementary Table

**Supplementary Table 1. Summary of ChIP conditions.**

| Sample              | Replicate | Source                  | Shearing method | Starting chromatin DNA (ng) | ChIP volume (ul) | Antibody |              |             |                  |
|---------------------|-----------|-------------------------|-----------------|-----------------------------|------------------|----------|--------------|-------------|------------------|
|                     |           |                         |                 |                             |                  | Antigen  | Brand        | Catalog no. | Amount used (ug) |
| H3K4me3_Lep         | 1         | Leptotene nuclei        | sonication      | 2,398                       | 1,000            | H3K4me3  | EpiCypher    | 13-0028     | 5                |
| H3K4me3_Zyg         | 1         | Zygotene nuclei         | sonication      | 2,688                       | 1,000            | H3K4me3  | EpiCypher    | 13-0028     | 5                |
| H3K4me3_ePac        | 1         | Early pachytene nuclei  | sonication      | 1,793                       | 1,000            | H3K4me3  | EpiCypher    | 13-0028     | 5                |
| H3K4me3_IPac        | 1         | Late pachytene nuclei   | sonication      | 4,936                       | 1,000            | H3K4me3  | EpiCypher    | 13-0028     | 5                |
| H3K4me3_Dip         | 1         | Diplotene nuclei        | sonication      | 6,502                       | 1,000            | H3K4me3  | EpiCypher    | 13-0028     | 5                |
| H3K4me3_Lep         | 2         | Leptotene nuclei        | sonication      | 805                         | 1,000            | H3K4me3  | EpiCypher    | 13-0028     | 1                |
| H3K4me3_Zyg         | 2         | Zygotene nuclei         | sonication      | 755                         | 1,000            | H3K4me3  | EpiCypher    | 13-0028     | 1                |
| H3K4me3_ePac        | 2         | Early pachytene nuclei  | sonication      | 4,585                       | 1,000            | H3K4me3  | EpiCypher    | 13-0028     | 1                |
| H3K4me3_IPac        | 2         | Late pachytene nuclei   | sonication      | 915                         | 1,000            | H3K4me3  | EpiCypher    | 13-0028     | 1                |
| H3K4me3_Dip         | 2         | Diplotene nuclei        | sonication      | 1,115                       | 1,000            | H3K4me3  | EpiCypher    | 13-0028     | 1                |
| H3K4me3_Lep         | 2         | Leptotene nuclei        | sonication      | 805                         | 1,000            | H3K4me3  | Abcam        | ab8580      | 1                |
| H3K4me3_Zyg         | 2         | Zygotene nuclei         | sonication      | 755                         | 1,000            | H3K4me3  | Abcam        | ab8580      | 1                |
| H3K4me3_ePac        | 2         | Early pachytene nuclei  | sonication      | 960                         | 1,000            | H3K4me3  | Abcam        | ab8580      | 1                |
| H3K4me3_IPac        | 2         | Late pachytene nuclei   | sonication      | 915                         | 1,000            | H3K4me3  | Abcam        | ab8580      | 1                |
| H3K4me3_Dip         | 2         | Diplotene nuclei        | sonication      | 1,115                       | 1,000            | H3K4me3  | Abcam        | ab8580      | 1                |
| Lep_input           | 1         | Leptotene nuclei        | sonication      | 48                          | NA               | NA       | NA           | NA          | NA               |
| Zyg_input           | 1         | Zygotene nuclei         | sonication      | 54                          | NA               | NA       | NA           | NA          | NA               |
| ePac_input          | 1         | Early pachytene nuclei  | sonication      | 36                          | NA               | NA       | NA           | NA          | NA               |
| IPac_input          | 1         | Late pachytene nuclei   | sonication      | 99                          | NA               | NA       | NA           | NA          | NA               |
| Dip_input           | 1         | Diplotene nuclei        | sonication      | 130                         | NA               | NA       | NA           | NA          | NA               |
| Lep_input           | 2         | Leptotene nuclei        | sonication      | 16                          | NA               | NA       | NA           | NA          | NA               |
| Zyg_input           | 2         | Zygotene nuclei         | sonication      | 15                          | NA               | NA       | NA           | NA          | NA               |
| ePac_input          | 2         | Early pachytene nuclei  | sonication      | 92                          | NA               | NA       | NA           | NA          | NA               |
| IPac_input          | 2         | Late pachytene nuclei   | sonication      | 18                          | NA               | NA       | NA           | NA          | NA               |
| Dip_input           | 2         | Diplotene nuclei        | sonication      | 22                          | NA               | NA       | NA           | NA          | NA               |
| H3K9ac_Lep          | 1         | Leptotene nuclei        | sonication      | 2,398                       | 1,000            | H3K9ac   | Active motif | 39918       | 1.5              |
| H3K9ac_Zyg          | 1         | Zygotene nuclei         | sonication      | 2,688                       | 1,000            | H3K9ac   | Active motif | 39918       | 3                |
| H3K9ac_ePac         | 1         | Early pachytene nuclei  | sonication      | 1,793                       | 1,000            | H3K9ac   | Active motif | 39918       | 3                |
| H3K9ac_IPac         | 1         | Late pachytene nuclei   | sonication      | 4,936                       | 1,000            | H3K9ac   | Active motif | 39918       | 1.5              |
| H3K9ac_Dip          | 1         | Diplotene nuclei        | sonication      | 6,502                       | 1,000            | H3K9ac   | Active motif | 39918       | 1.5              |
| H3K9ac_Lep          | 2         | Leptotene nuclei        | sonication      | 601                         | 800              | H3K9ac   | Active motif | 39918       | 1                |
| H3K9ac_Zyg          | 2         | Zygotene nuclei         | sonication      | 6,026                       | 1,000            | H3K9ac   | Active motif | 39918       | 1                |
| H3K9ac_ePac         | 2         | Early pachytene nuclei  | sonication      | 4,585                       | 1,000            | H3K9ac   | Active motif | 39918       | 1.5              |
| H3K9ac_IPac         | 2         | Late pachytene nuclei   | sonication      | 2,185                       | 1,000            | H3K9ac   | Active motif | 39918       | 1                |
| H3K9ac_Dip          | 2         | Diplotene nuclei        | sonication      | 1,898                       | 1,000            | H3K9ac   | Active motif | 39918       | 1                |
| No-antibody control | 1         | Leptotene nuclei        | sonication      | 1,348                       | 800              | NA       | NA           | NA          | NA               |
| H3K4me3             | 1         | Early (SCP3+H1t) nuclei | MNase digestion | 193                         | 500              | H3K4me3  | Abcam        | ab8580      | 1                |
| H3K9ac              | 1         | Early (SCP3+H1t) nuclei | MNase digestion | 193                         | 500              | H3K9ac   | Active motif | 39918       | 1                |
| H3K4me2             | 1         | Early (SCP3+H1t) nuclei | MNase digestion | 193                         | 500              | H3K4me2  | Active motif | 39914       | 1                |
| H3K36me3            | 1         | Early (SCP3+H1t) nuclei | MNase digestion | 193                         | 500              | H3K36me3 | Active motif | 61102       | 1                |
| H3K4me1             | 1         | Early (SCP3+H1t) nuclei | MNase digestion | 172                         | 500              | H3K4me1  | Abcam        | ab8895      | 1                |
| H3K27ac             | 1         | Early (SCP3+H1t) nuclei | MNase digestion | 193                         | 500              | H3K27ac  | Abcam        | ab177178    | 5                |
| H4ac5               | 1         | Early (SCP3+H1t) nuclei | MNase digestion | 193                         | 500              | H4ac5    | Millipore    | 06-946      | 5ul              |
| H4K8ac              | 1         | Early (SCP3+H1t) nuclei | MNase digestion | 193                         | 500              | H4K8ac   | Abcam        | ab15823     | 5                |
| H4K12ac             | 1         | Early (SCP3+H1t) nuclei | MNase digestion | 193                         | 500              | H4K12ac  | Active motif | 39928       | 5                |
| H4K20me3            | 1         | Early (SCP3+H1t) nuclei | MNase digestion | 172                         | 500              | H4K20me3 | Millipore    | 07-463      | 1                |
| H3K4ac              | 1         | Early (SCP3+H1t) nuclei | MNase digestion | 172                         | 500              | H3K4ac   | Abcam        | ab176799    | 1                |
| H3K79me1            | 1         | Early (SCP3+H1t) nuclei | MNase digestion | 172                         | 500              | H3K79me1 | Abcam        | ab2886      | 1                |
| H3K79me3            | 1         | Early (SCP3+H1t) nuclei | MNase digestion | 172                         | 500              | H3K79me3 | Abcam        | ab2621      | 1                |
| H3K27me3            | 1         | Early (SCP3+H1t) nuclei | MNase digestion | 172                         | 500              | H3K27me3 | Millipore    | 07-449      | 1                |
| H3K9me2             | 1         | Early (SCP3+H1t) nuclei | MNase digestion | 172                         | 500              | H3K9me2  | Abcam        | ab1220      | 1                |
| H3K9me3             | 1         | Early (SCP3+H1t) nuclei | MNase digestion | 172                         | 500              | H3K9me3  | Active motif | 39766       | 1                |
| H3K27me1            | 1         | Early (SCP3+H1t) nuclei | MNase digestion | 172                         | 500              | H3K27me1 | Millipore    | 07-448      | 1                |
| H3                  | 1         | Early (SCP3+H1t) nuclei | MNase digestion | 193                         | 500              | H3       | Abcam        | ab1791      | 1                |
| IgG                 | 1         | Early (SCP3+H1t) nuclei | MNase digestion | 193                         | 500              | IgG      | Millipore    | 12-370      | 1                |
| Input               | 1         | Early (SCP3+H1t) nuclei | MNase digestion | 12                          | NA               | NA       | NA           | NA          | NA               |

## Supplementary References

1. Shah, R. N. *et al.* Examining the Roles of H3K4 Methylation States with Systematically Characterized Antibodies. *Mol. Cell* **72**, 162–177.e7 (2018).
2. Brick, K., Smagulova, F., Khil, P., Camerini-Otero, R. D. & Petukhova, G. V. Genetic recombination is directed away from functional genomic elements in mice. *Nature* **485**, 642–645 (2012).
3. Ramírez, F., Dünder, F., Diehl, S., Grüning, B. A. & Manke, T. deepTools: a flexible platform for exploring deep-sequencing data. *Nucleic Acids Res.* **42**, W187–91 (2014).
